# Supplementary material for: Simultaneous Electrochemical Detection of Nitrite and Hydrogen Peroxide Based on 3D Au-rGO/FTO Obtained Through a One-Step Synthesis
Source: MDPI journal article supplement (doi:10.3390/s19061304), 2019-03-15
Supplement: s1 [file s1]

# Simultaneous Electrochemical Detection of Nitrite and Hydrogen Peroxide Based on 3D Au-rGO/FTO Obtained Through a One-Step Synthesis

Chengcheng Li <sup>1</sup>, Delun Chen <sup>1</sup>, Yuanyuan Wang <sup>2</sup>, Xiaoyong Lai <sup>3</sup>, Juan Peng <sup>3</sup>, Xiaohong Wang <sup>1</sup>, Kexi Zhang <sup>1,\*</sup> and Yang Cao <sup>1,\*</sup>

<sup>1</sup> State Key Laboratory of Marine Resource Utilization in South China Sea, College of Materials and Chemical Engineering, Hainan University, Haikou 570228, China; lichengcheng@hainu.edu.cn (C.L.); chendelun2014@163.com (D.C.); wangxiaohong@hainu.edu.cn (X.W.)

<sup>2</sup> Laboratory of Tropical Biomedicine and Biotechnology, School of Tropical Medicine and Laboratory Medicine, Hainan Medical University, Haikou 571199, China; vivian1004@126.com

<sup>3</sup> Laboratory Cultivation Base of Natural Gas Conversion, School of Chemistry and Chemical Engineering, Ningxia University, Yinchuan 750021, China; xylai@nxu.edu.cn (X.L.); pengjuan@nxu.edu.cn (J.P.)

\* Correspondence: zhangkexi@hainu.edu.cn (K.Z.); cy507@hainu.edu.cn (Y.C.); Tel./Fax: +86-898-66259764 (K.Z. & Y.C.)

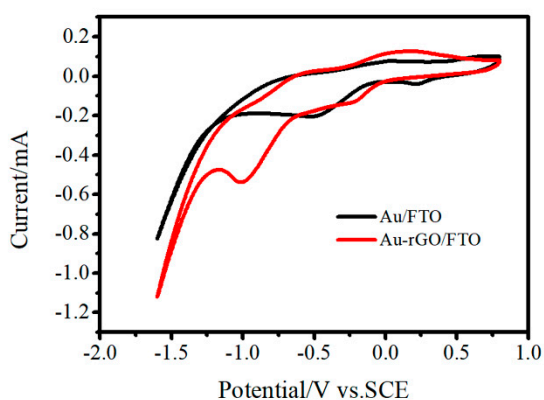

Figure S1. CVs for the synthesis of Au-rGO/FTO and Au/FTO

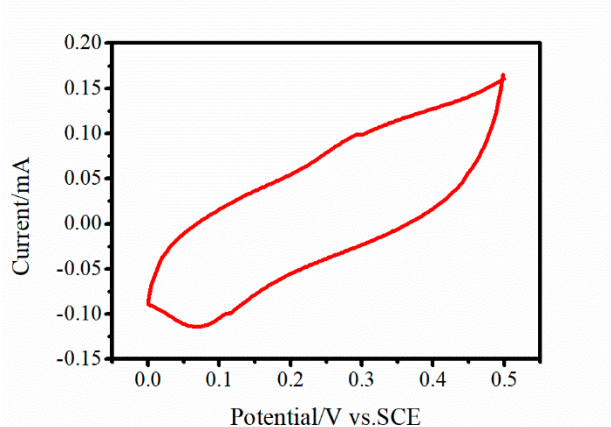

Figure S2. CV of Au-rGO/FTO in 1M NaOH. Scan rate: 50 mV/s

The capacitance values were calculated from the CV curves (Figure S2) according to the following Equation (S1)[1]:

$$C = \frac{1}{v(V_f - V_i)} \int_{V_i}^{V_f} I(V) dV \quad (S1)$$

where  $v$  is the scan rate ( $50 \text{ mV s}^{-1}$ ),  $V_f$  and  $V_i$  are the integration potential limits of the voltammetric curve ( $V_f=0.5 \text{ V}$ ,  $V_i=0.0 \text{ V}$ ), and  $I(V)$  is the voltammetric discharge current (A). According to the calculation,  $C$  is  $1024.4 \mu\text{F}$ .

Specific capacitance ( $C'$ ) of 3D Au-rGO/FTO was calculated based on the actual area ( $A$ ) according to the following Equation (S2)[1]:

$$C' = \frac{C}{A} \quad (S2)$$

For carbon materials,  $C'$  is  $21 \mu\text{F cm}^{-2}$  [2], so the area of 3D Au-rGO/FTO could be estimated at  $48.8 \text{ cm}^2$ :

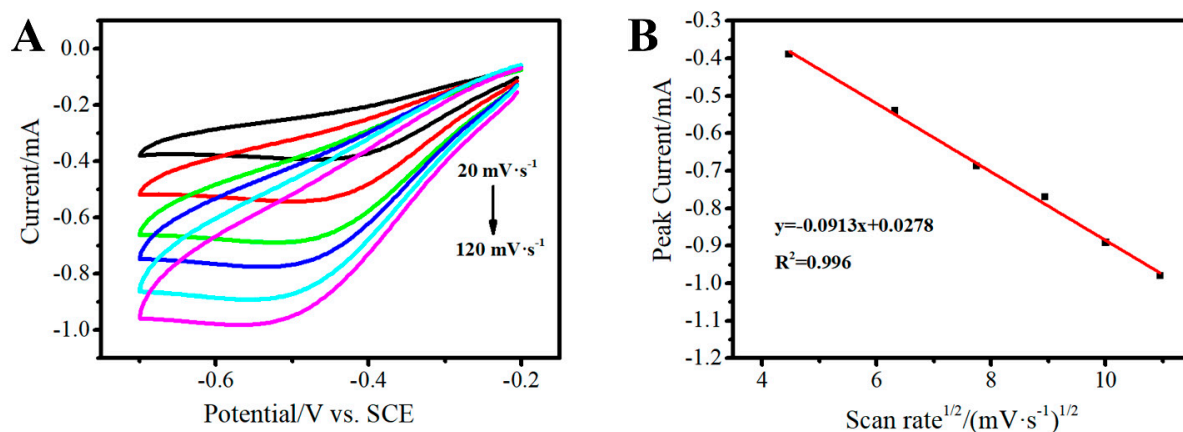

**Figure S3.** CVs of the 3D Au-rGO/FTO in PBS containing 3 mM  $\text{H}_2\text{O}_2$  at scan rates from 20 to  $120 \text{ mV s}^{-1}$  (A), the plots of anodic peak currents to the square root of scanning rates (B)

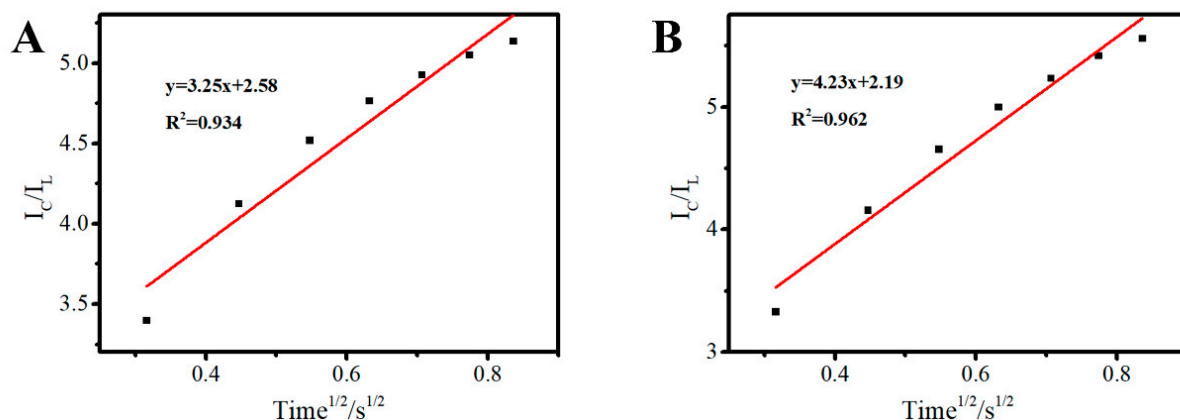

**Figure S4.**  $I_C/I_L$ -time $^{1/2}$  of Au/FTO (A), 3D Au-rGO/FTO (B). ( $I_C$  is the catalytic current of the corresponding electrode in the presence of  $\text{H}_2\text{O}_2$ ,  $I_L$  is the limiting current in the absence of  $\text{H}_2\text{O}_2$ )

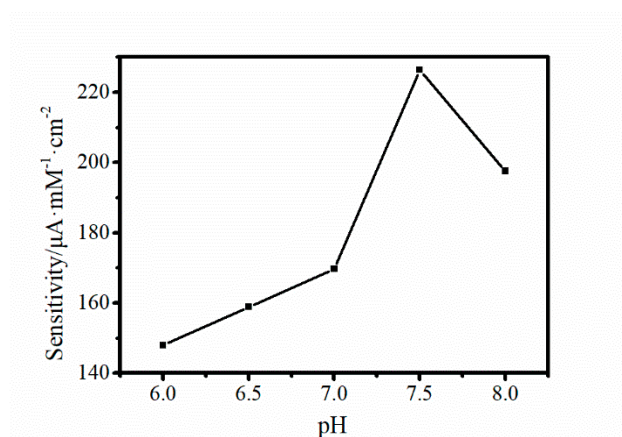

**Figure S5.** The sensitivity of 3D Au-rGO/FTO to  $\text{H}_2\text{O}_2$  against pH

### Stability, reusability and interference studies of the 3D Au-rGO/FTO

The stability of the modified electrode was also studied in the work by CV. It indicated a good stability in PBS containing 1.5 mM  $\text{NaNO}_2$  solution with the relative standard deviation (RSD) of 1.6% ( $n = 5$ ). It was found that the RSD of the reduction current was about 0.4% ( $n = 5$ ) in PBS containing 0.3 mM  $\text{H}_2\text{O}_2$ . These clearly confirmed the excellent stability of 3D Au-rGO/FTO.

The reusability of five 3D Au-rGO/FTO electrodes was tested by CV. In pH = 7.5 PBS containing 1.5 mM  $\text{NaNO}_2$  solution, the five electrodes showed good reusability with RSD of 7.0% ( $n = 5$ ), and they also indicated a good reusability in pH=7.5 PBS containing 0.3 mM  $\text{H}_2\text{O}_2$  with RSD of 5.9% ( $n = 5$ ). The experimental results showed that 3D Au-rGO/FTO has good reusability.

The anti-interfering capability of 3D Au-rGO/FTO was evaluated. As Figure S6 shows, most of the species, such as NaCl and KCl in a 100-fold concentration,  $\text{H}_2\text{O}_2$ , ascorbic acid, glucose and uric acid in a 10-fold concentration, showed a little interference (lower than 5%) toward the determination of nitrite. All above results corroborated that 3D Au-rGO/FTO had a superb stability and good anti-interferent ability for the determination of nitrite.

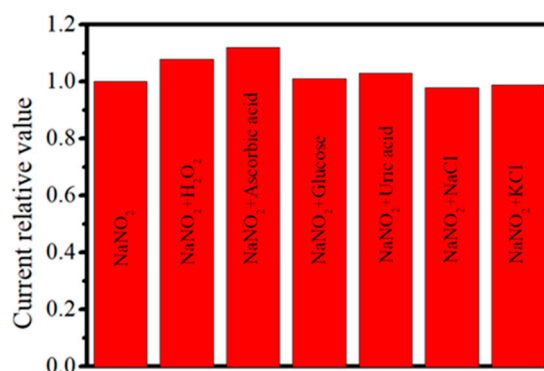

**Figure S6.** Results of the interference study on the response of 100-fold KCl and NaCl, 10-fold  $\text{H}_2\text{O}_2$ , ascorbic acid, glucose and uric acid

The electrochemical response of 3D Au-rGO/FTO for  $\text{H}_2\text{O}_2$  in the presence of some interference, such as NaCl, KCl and  $\text{NaNO}_2$  in a 10-fold concentration, ascorbic acid, glucose,

and uric acid in an equivalent concentration was shown in Figure S7. The interferences had little influence (lower than 5%) toward the determination of  $\text{H}_2\text{O}_2$ . The results verified that these substances did not cause an obvious interference for  $\text{H}_2\text{O}_2$  detection, demonstrating a good selectivity of 3D Au-rGO/FTO.

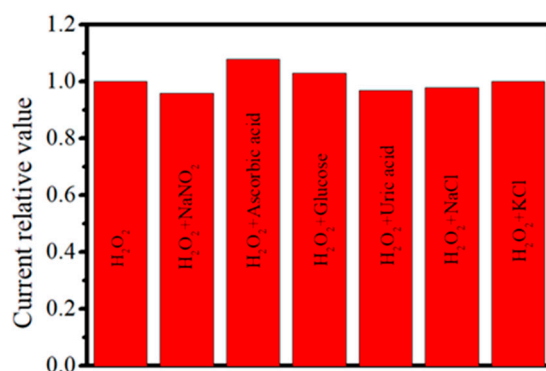

**Figure S7.** Results of the interference study on the response of 10-fold  $\text{NaNO}_2$ ,  $\text{KCl}$  and  $\text{NaCl}$ , equivalent concentration of ascorbic acid, glucose and uric acid

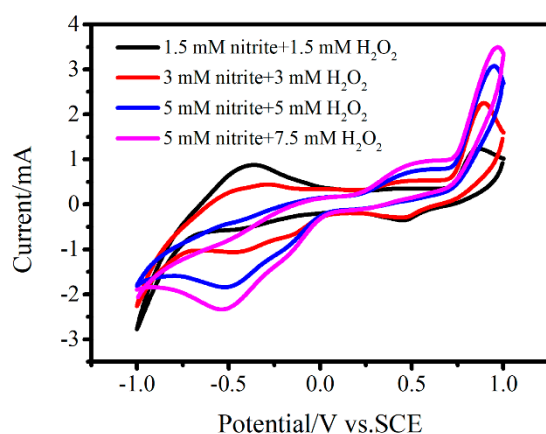

**Figure S8.** CVs of the 3D Au-rGO/FTO in mixture containing PBS (0.1M, PH = 7.5) and different concentrations of nitrite and  $\text{H}_2\text{O}_2$

## References

1. Shi, X.; Wu, Z.-S.; Qin, J.; Zheng, S.; Wang, S.; Zhou, F.; Sun, C.; Bao, X., Graphene-based linear tandem micro-supercapacitors with metal-free current collectors and high-voltage output. *Adv. Mater.* **2017**, 29, 1703034.
2. Qi, J.L.; Wang, X.; Lin, J.H.; Zhang, F.; Feng, J.C.; Fei, W.-D., A high-performance supercapacitor of vertically-oriented few-layered graphene with high-density defects. *Nanoscale* **2015**, 7, 3675–3682.
